# Supplementary material for: The Satellite Cell Niche Regulates the Balance between Myoblast Differentiation and Self-Renewal via p53
Source: PubMed Central journal article supplement (PMC5918193; doi:10.1016/j.stemcr.2018.01.007), 2018-02-08
Supplement: mmc1.pdf [file mmc1.pdf]

**Stem Cell Reports, Volume 10**

**Supplemental Information**

**The Satellite Cell Niche Regulates the Balance between Myoblast Differentiation and Self-Renewal via p53**

**Valentina Flamini, Rachel S. Ghadiali, Philipp Antczak, Amy Rothwell, Jeremy E. Turnbull, and Addolorata Pisconti**

**The satellite cell niche regulates the balance between myoblast  
differentiation and self-renewal via p53**

*Valentina Flamini, Rachel S. Ghadiali, Philipp Antczak, Amy Rothwell, Jeremy E.*

*Turnbull and Addolorata Pisconti*

**Supplementary Information**

## SUPPLEMENTARY METHODS

### *Myofibre cultures*

Mice were culled under a CO<sub>2</sub> raising gradient and the gastrocnemius muscles dissected, incubated with 400 U/mL collagenase type I (*Worthington*) for 90 min then individual myofibres were picked using a glass Pasteur pipette whose tip had been flame-polished and flushed with fresh primary myoblast growth medium (F12 + 0.4 mM CaCl<sub>2</sub> + 15% horse serum + 1% penicillin + 1% streptomycin + 2 mM GlutaMax) in a cell culture incubator (humidified 37 °C, atmospheric O<sub>2</sub> and 5% CO<sub>2</sub>). After 3 subsequent passages in fresh primary myoblast growth medium to remove debris and contaminant fibroblasts, FGF2 was added at the final concentration of 2 nM in the last passage. 2nM FGF2 was added again at 24 h and then the medium was changed once at 48 hours supplementing again with 2nM FGF2. Although it is still debated whether SCs derived from different myofibre types are also different and retain these different properties once cultured *ex vivo*, we chose to use the gastrocnemius muscle for myofibre preparations, rather than the most commonly used extensor digitorum longus (EDL) muscle, because the gastrocnemius muscle contains all myofibre types and therefore a myofibre-associated myoblast preparation obtained from the gastrocnemius muscle is more representative of all possible “types” of SCs than if the preparation was obtained from the EDL muscle, which contains almost exclusively fast twitch myofibres. This was especially important because the dispersed myoblast preparations were obtained from whole limb muscles and therefore they too contained all “types” of SCs. The same batch of horse serum was used throughout the work presented in this manuscript.

### ***Myofibre-associated myoblast RNA quality control***

We ran preliminary experiments to test for the presence of RNA from myofibre debris in our myofibre-associated myoblast preparations. We re-suspended the final pellet obtained after myoblast stripping into primary myoblast growth medium, plated this cell suspension on gelatin-coated dishes and the day after we extracted RNA from both the adherent cells and the supernatant. If significant amounts of contaminant RNA from the myofibres had been present in the final myoblast pellet, we should have been able to extract it and detect it from the supernatant of the plated myoblasts. Instead we only detected RNA from the adherent cell population not from the supernatant, which, once analysed by Bioanalyzer, showed only non-RNA contaminants (Fig. S7D-E), indicating that the final pellet obtained from myoblast isolation from myofibres is highly pure and does not contain myofibre RNA.

### ***Preparation of dispersed myoblasts***

Mice were culled under a CO<sub>2</sub> raising gradient and all the hind-limb muscles dissected, finely minced with scissors and then incubated with 400 U/mL collagenase type I for 60 minutes at 37 °C. After centrifuging at low speed (30 xg) for 3 minutes to pellet larger tissue debris, the supernatant containing mono-nucleated cells was collected, diluted with two volumes of primary myoblast growth medium (F12 + 0.4 mM CaCl<sub>2</sub> + 15% horse serum + 1% penicillin + 1% streptomycin + 2 mM GlutaMax) and then centrifuged again at 500 xg to pellet the mono-nucleated cells. Fibroblasts were removed via two subsequent pre-plating steps (2h + 1h, each one on gelatin-coated dishes, at humidified 37 °C, atmospheric O<sub>2</sub> and 5% CO<sub>2</sub>). After the second pre-plating the floating cells were plated on gelatin-coated dishes in primary myoblast growth medium, supplemented with 2 nM FGF2 and incubated for 48 or 72 hours, with one medium change at 48 hours. This protocol yielded a preparation of

great purity (over 95% MYF5+/PAX7+ cells). For the microarray experiments, at 48 and 72 h after plating, cells were washed with phosphate buffered saline (PBS) and lysed with RLT buffer (Qiagen) prior to RNA extraction. For the reserve cell assays, 48 h after plating cells were washed twice with F12C (F12 + 0.4 mM CaCl<sub>2</sub>) and then switched to primary myoblast low serum medium (F12 + 0.4 mM CaCl<sub>2</sub> + 3% horse serum + 1% penicillin/streptomycin + 2 mM GlutaMax) for 3 days. After 3 days, cells were either fixed and immunostained or “washed” with F12C and incubated again in primary myoblast growth medium (containing 15% horse serum) for 2 days, prior to being fixed and immunostained. The same batch of horse serum was used throughout the work presented in this manuscript.

### ***C2C12 myoblast cultures***

C2C12 myoblasts (Yaffe and Saxel, 1977) were cultured in C2C12 growth medium (DMEM + 10% foetal bovine serum + 2 mM L-glutamine + 1% penicillin + 1% streptomycin) up to 90% confluence then washed twice with DMEM and switched to C2C12 low serum medium (DMEM + 3% horse serum + 2 mM L-glutamine + 1% penicillin + 1% streptomycin) to induce differentiation and reserve cell generation (Yoshida et al., 1998) in the presence/absence of either 20 µM Nutlin-3 (Sigma Aldrich) or an equal volume of vehicle (DMSO, Sigma Aldrich) for an additional 3 days. After 3 days, cells were either immediately fixed and immunostained or “washed” with DMEM and re-incubated in C2C12 growth medium (containing 10% foetal bovine serum) for an additional 2 days prior to being fixed and immunostained. The same batch of foetal bovine serum was used throughout the work presented in this manuscript.

### ***Antibodies***

For immunofluorescence, primary antibodies used were: mouse anti-Pax7 (DSHB) 1:100, mouse anti-p53 (Cell Signaling, Cat No. 2524) 1:100, rabbit anti-myogenin (SCBT, Cat. No. sc-576) 1:500, rabbit anti-SDC3 (kindly donated by Prof Brad Olwin, University of Colorado (Cornelison et al., 2001) 1:500, rabbit anti-KI67 (Abcam, Cat. No. ab15580) 1:400, mouse anti-myogenin (DSHB, clone F5D) 1:100, mouse anti-myosin heavy chain (DSHB, clone MF20) 1:100, rabbit anti-MYF5 (SCBT, Cat. No. sc-302) 1:500, rabbit anti-MYOD (SCBT, Cat. No. sc-760) 1:600. Secondary antibodies conjugated to Alexa488, Alexa555 or Alexa647 (Invitrogen) were used at 1:500. DAPI (Invitrogen) was used at 2  $\mu$ M in PBS.

For western blotting, primary antibodies used were: mouse anti-p53 (Cell Signaling, Cat No. 2524) 1:1,000; mouse anti-GAPDH (Sigma Aldrich, Cat. No. G8795) 1:3,000; mouse anti-myogenin (DSHB, clone F5D) at 1:1,000 and mouse anti-sarcomeric myosin (DSHB, clone MF20) at 1:3,000. Secondary antibodies were from Santa Cruz Biotechnology and used at 1:10,000. Chemiluminescence was detected on a LAS 4,000 (GE) image doc system.

### ***Microscopy***

Microscope images were acquired on an EVOS FL imaging system (Life Technologies) with a 10X, a 20X or a 40X objective and consistent imaging parameters.

### ***Microarrays***

Fluorescently labelled amplified complementary RNA (cRNA) was generated using a Low Input Quick Amp Labelling kit, One-Colour (Agilent). The method utilises an oligo (dT) primer bearing a T7 promoter, and MMLV-RT, producing double stranded

cDNA from mRNA; the cDNA then serves as template for *in vitro* transcription with T7 RNA Polymerase, which linearly amplifies target material whilst simultaneously incorporating cyanine 3-labelled CTP. For each labelling reaction, 70 ng of total RNA was used as input, along with appropriately diluted Spike Mix from the One-Colour RNA Spike-In kit (Agilent). cRNA was purified using an RNeasy Mini Kit (Qiagen) and quantified on a NanoDrop ND-1000 Spectrophotometer version 3.3.0. For array hybridisation, 600 ng of each cyanine 3-labelled cRNA, was combined with 5 µl of 10X Gene Expression Blocking Agent and 1 µl of 25X Fragmentation Buffer (both from the Agilent Gene Expression Hybridisation kit) in a total volume of 25 µl. Target mixtures were then incubated at 60 °C for 30 min to fragment the RNA to approximately 150 nucleotides. Fragmentation was terminated by cooling on ice for 1 min followed by addition of 25 µl of 2X Hi-RPM Hybridisation Buffer (Agilent). Agilent SurePrint 8X 60K Mouse Gene Expression microarrays (Design ID 028005) were loaded and hybridised using Agilent hardware, namely: gasket slides, SureHyb chambers and hybridisation oven. Hybridisation was carried out at 65 °C with 10 rotations per minute for 17 h. After this time, microarrays were washed using an Agilent Gene Expression Wash Buffer Kit according to the manufacturer's instructions. Arrays were scanned immediately at a resolution of 3 µm using an Agilent DNA Microarray Scanner to generate 20 bit tiff images. Data was extracted and QC reports generated using Agilent Feature Extraction version 11.0.1.1. Array quality was assessed by visual inspection of each tiff and analysis of the associated QC report, which indicates the dynamic range of the experiment, hybridisation and background uniformity, as well as an evaluation of metrics associated with the RNA spike-ins added to the labelling reactions.

### ***Transfection***

C2C12 myoblast cultures that had reached 90% confluence or myofibre cultures were washed twice with PBS and switched to OptiMem before receiving a 1:3, volume:volume mixture of siRNA (diluted in OptiMem for a final 30 or 60 nM):Lipofectamine2000. After addition of the siRNA:Lipofectamine2000 mixture, plates were incubated for three hours in a cell culture incubator (humidified 37 °C, atmospheric O<sub>2</sub> and 5% CO<sub>2</sub>), then the medium was replaced with low serum medium that contained either 20 µM Nutlin-3 or an equal volume of DMSO and incubated for another day (for western blot analysis of C2C12 cells) or three days (for immunofluorescence analysis of C2C12 cells) or 2 days (for immunofluorescence analysis of myofibre cultures). siRNAs were either control (scrambled) siRNA (Sigma Aldrich) or anti-p53 siRNA (Sigma Aldrich, SASI\_Mm02\_00310137).



## SUPPLEMENTARY FIGURES

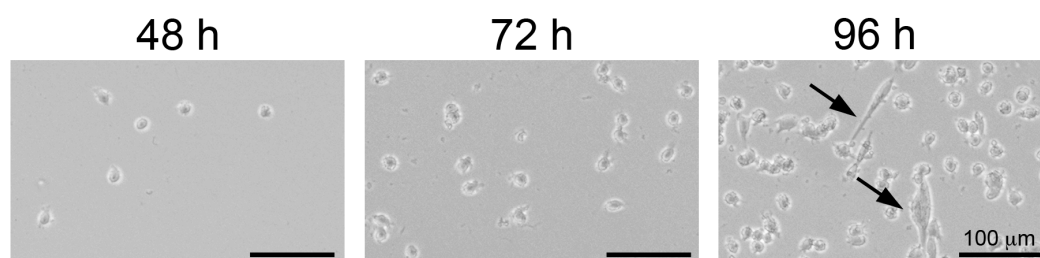

**Supplementary Figure S1 – supplementing Fig. 1A-B: Dispersed myoblasts cultured on gelatin in the presence of high serum and FGF2 undergo spontaneous differentiation.** Primary SC-derived myoblasts were cultured on gelatin-coated plates in primary myoblast growth medium supplemented with 2 nM FGF2 for 4 days. During the first 2-3 days cells mostly proliferated, around the third day they underwent spontaneous differentiation such that myotubes were visible at day 4 (black arrows).

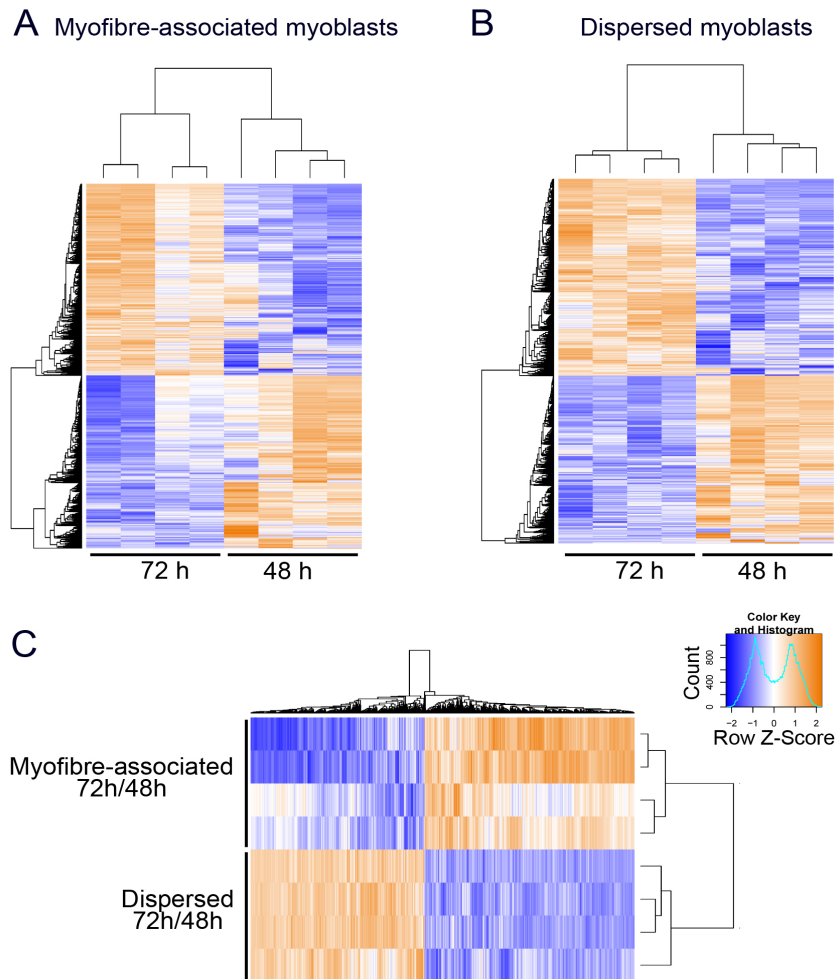

**Supplementary Figure S2 – supplementing Fig. 1E: Replicate reproducibility was excellent in both dispersed and myofibre-associated myoblast cultures, which appeared very different in their transcriptome signature during myogenic progression. A-B)** Hierarchical clustering of the Top 200 differentially expressed genes between 48 and 72 hours in culture in myofibre-associated (A) and dispersed (B) myoblasts. For each condition the biological replicates clustered together suggesting high reproducibility and high quality of the data. Moreover, as visually shown by the heatmaps, the transcriptomic signature at 48 hours is very different from the transcriptomic signature at 72 hours for both culture conditions. **C)** Gene expression regulation between 48 and 72 hours in myofibre-associated myoblasts and in dispersed myoblasts are different.

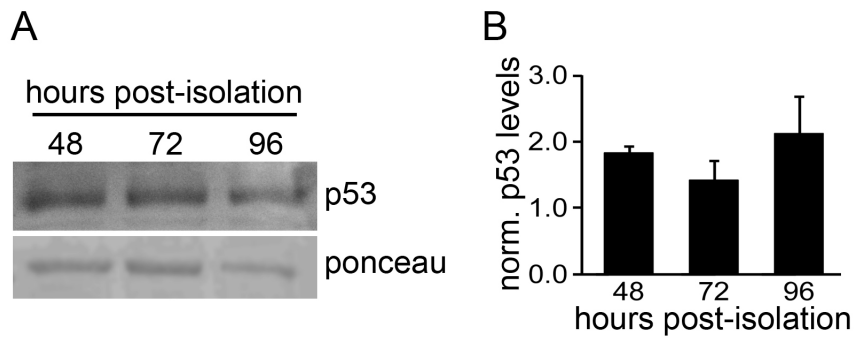

**Supplementary Figure S3 – supplementing Fig. 3: p53 protein levels do not significantly increase over time in primary dispersed myoblast cultures. A-B)**

Primary dispersed myoblasts were cultured for up to 96 hours post-isolation, lysed at three time points: 48, 72 and 96 hours, then total proteins extracted and analysed by western blot to detect p53 levels. Ponceau staining was used as loading control. A representative western blot image is shown in (A) while (B) is the quantification of three independent experiments.

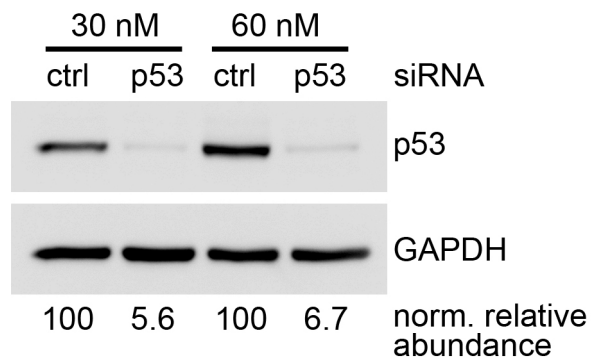

**Supplementary Figure S4 – supplementing Fig. 4: siRNA-mediated p53**

**knockdown is highly efficient.** C2C12 myoblast were cultured in growth medium until they reached 90% confluence then transfected with either control siRNA (30 nM, lane 1; 60 nM, lane 3) or anti-p53 siRNA (30 nM, lane 2; 60 nM, lane 4), 3 h later switched to low serum medium supplemented with either DMSO or 20  $\mu$ M Nutlin-3 and cultured for an additional 24 h prior to being lysed and analysed by blot to reveal p53 (top gel) and GAPDH (bottom gel) abundance. The intensity of the p53 bands normalised to the intensity of the GAPDH bands are reported below the gel images as percentage of the control band for each one of the two siRNA concentrations tested. Since the level of knockdown was comparable between 30 nM and 60 nM siRNA, all subsequent experiments were carried out using 30 nM siRNA.

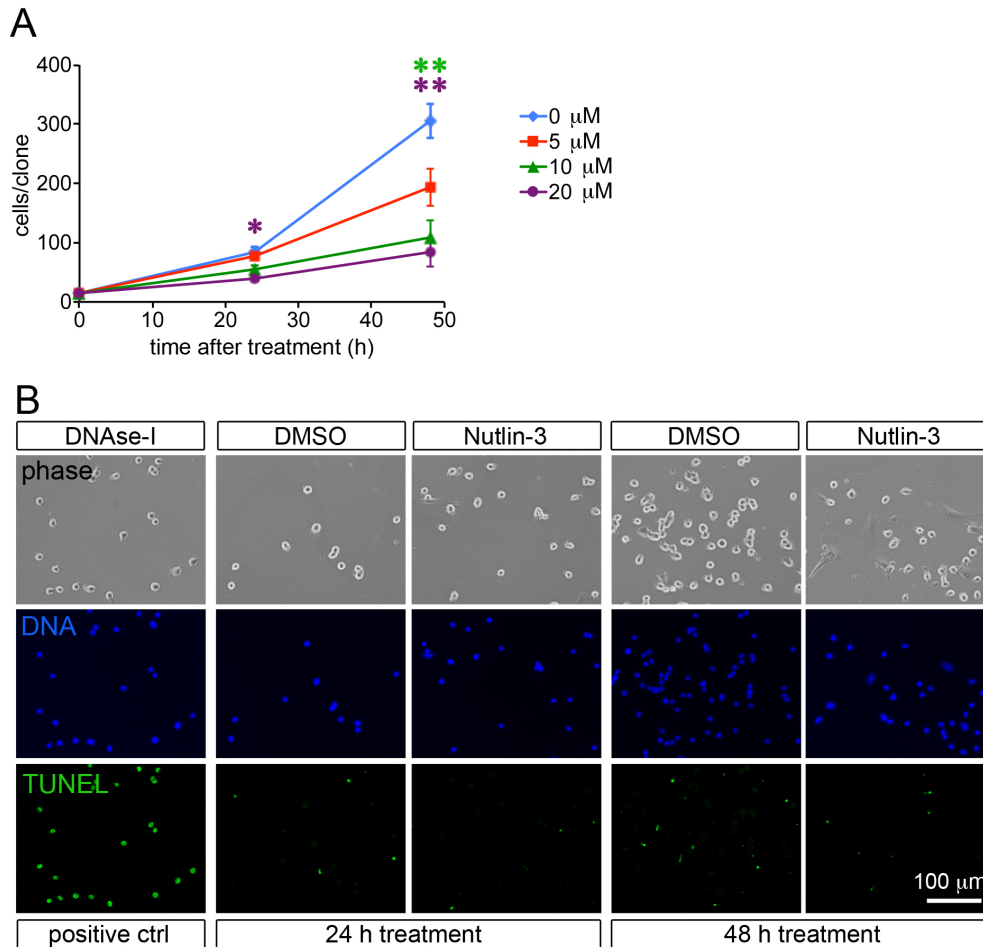

**Supplementary Figure S5 – supplementing Fig. 5: Nutlin-3 treatment of primary**

**dispersed myoblasts inhibits proliferation without increasing cell death. A)**

Primary dispersed myoblasts were expanded for two days prior to being detached and re-plated at clonal density for an additional three days. The day after plating (time 0 treatment) culture medium was supplemented with either DMSO or Nutlin-3 at 3 different concentrations: 5  $\mu$ M, 10  $\mu$ M or 20  $\mu$ M. Samples were fixed either the day after (24 h treatment) or 2 days later (48 h treatment) and the numbers of cells/clone scored and plotted as average across 3 independent experiments  $\pm$  S.E.M. At 24 h, only 20  $\mu$ M Nutlin-3 significantly reduces proliferation (\* =  $p < 0.05$ ), at 48 h both 10  $\mu$ M and 20  $\mu$ M Nutlin-3 significantly reduce proliferation (\*\* =  $p < 0.01$ ). **B)** Primary dispersed myoblasts were plated and expanded for one day before being treated with either DMSO or 20  $\mu$ M Nutlin-3, then fixed either the day after (24 h treatment) or 2

days later (48 h treatment), processed for TUNEL assay (green) and counter-stained with DAPI to detect DNA (blue). At each time point, a non-treated control was also fixed and treated with DNase-I before TUNEL assay to induce DNA breakage – this is labelled as DNase-I/positive control. Although in the positive control all cells are TUNEL+ indicating that the TUNEL assay worked, in both the DMSO and Nutlin-3-treated samples, at both time points, only very few TUNEL+ spots are detected, which do not co-localise with DAPI staining (hence the lack of quantification) and might therefore be an artifact or might be late apoptotic cells whose DNA was so extremely fragmented that no DAPI staining was detectable any more. In any case, there appear to be no difference between the DMSO-treated and the Nutlin-3-treated samples.

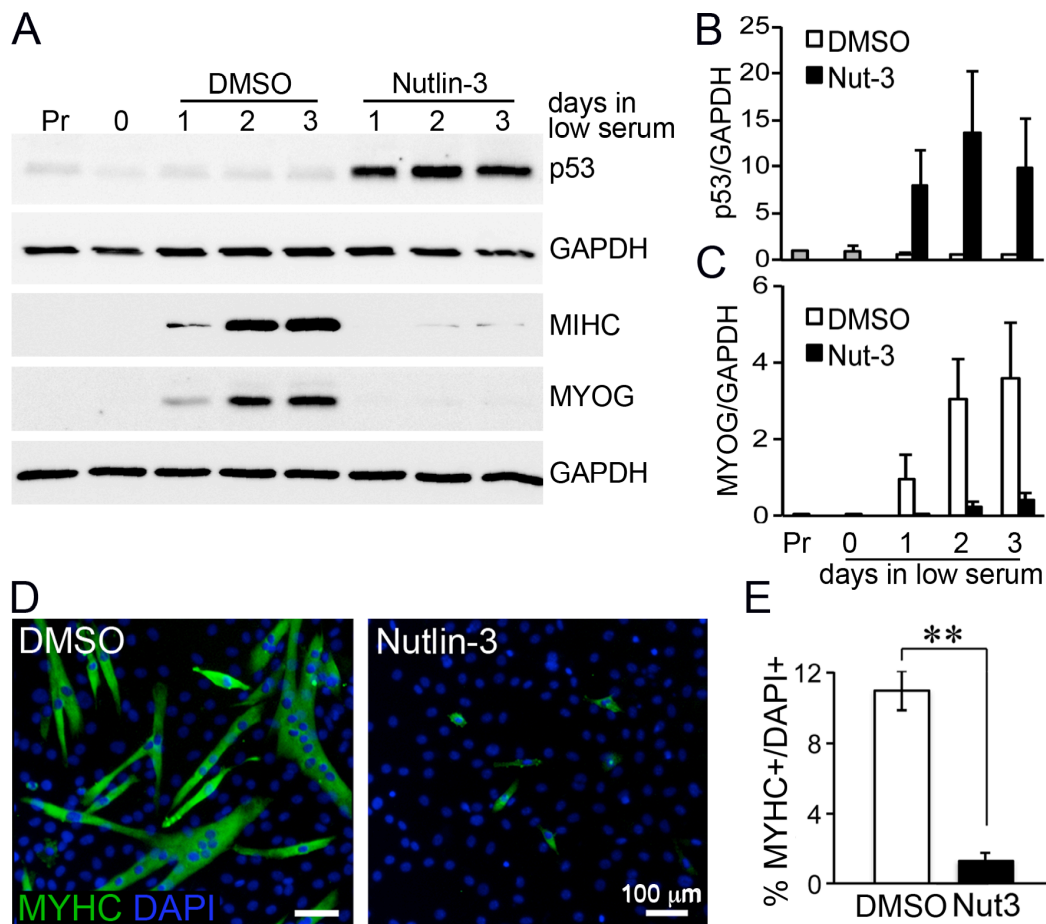

**Supplementary Figure S6 – supplementing Fig. 5 and Fig. 6: A sustained increase in p53 levels reduces C2C12 myoblast differentiation.** A-C) C2C12 myoblast cultures were grown to 90% confluence then switched to low serum medium (DMEM + 3% horse serum + 1% pen/strep + 2 mM L-glutamine) either in the presence of 20  $\mu$ M Nutlin-3 or in the presence of an equal volume of DMSO and lysed at the following time points: Pr (= proliferating) is the day before reaching 90% confluence; 0 is the day when 90% confluence was reached; 1, 2 and 3 are the days subsequent to medium switch. At each time point cells were lysed and then all time points loaded onto a 10% SDS-PAGE for western blot analysis to reveal the abundance of myosin heavy chain (MYHC), myogenin (MYOG), p53 and GAPDH. Representative gels from three independent experiments are shown in (A) where to top GAPDH gel is related to the p53 gel, while the bottom GAPDH gel is related to

the MYHC and MYOG gel. In (B-C) is the quantification of three independent experiments carried out as in (A) where the average band intensity for p53 (B) or MYHC (C) normalised to the band intensity for its related GAPDH at each time point is plotted. Error bars are S.E.M. across the three independent experiments. **D-E)** Immunofluorescence analysis of C2C12 myoblasts switched to low serum medium when 90% confluence was reached and treated with either 20  $\mu$ M Nutlin-3 or DMSO for 3 days prior to fixation and immunostaining to detect MYHC (green) and DNA (DAPI, blue) reveals that differentiation is reduced by Nutlin-3 treatment. In (D) one representative of several ( $> 10$ ) independent experiments is shown. In (D) quantitation of three independent experiments across 10 technical replicates for each one of three biological replicates (N = 30) as the percentage of MYHC+ cells over the total numbers of DAPI+ cells is plotted. Error bars are S.E.M. \*\* =  $p < 0.01$ .



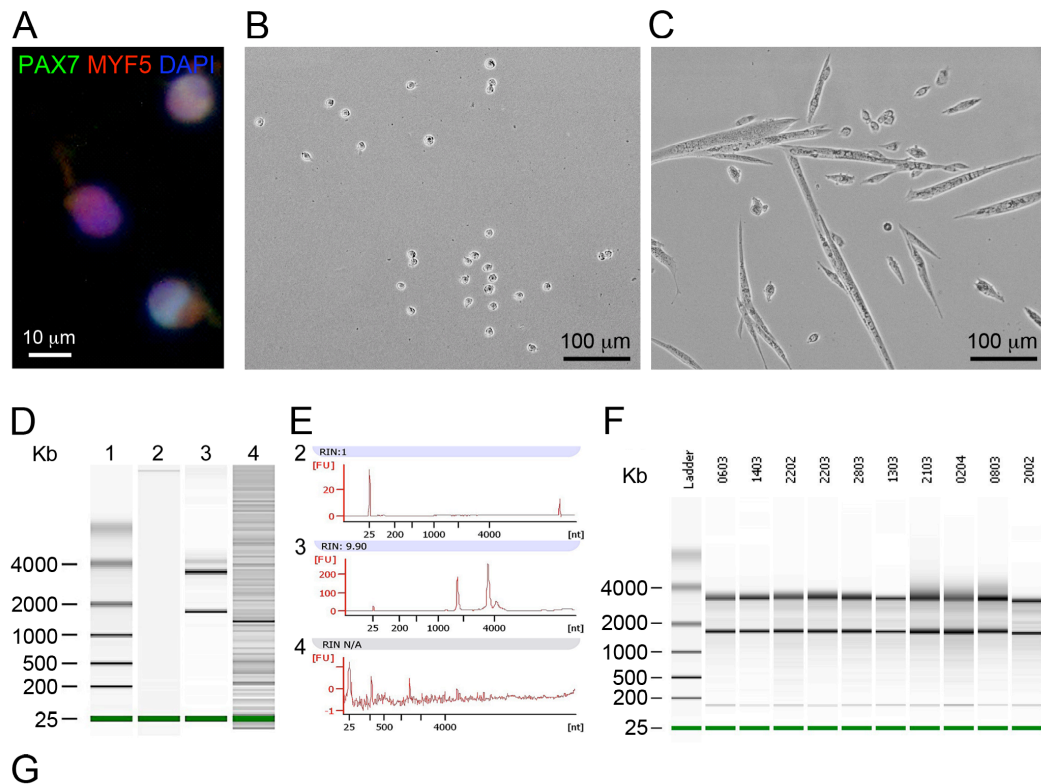

**G**

| Sample name | Myoblas Prep | RNA extraction and purification method | Quantification method | Concentration (ng/ul) | RIN  | NanoDrop 260/280 ratio |
|-------------|--------------|----------------------------------------|-----------------------|-----------------------|------|------------------------|
| 0603 (72h)  | myofibre     | Qiagen RNeasy kit                      | Bioanalyser           | 32.3                  | 8.2  | N.A.                   |
| 1403 (72h)  | myofibre     | Qiagen RNeasy kit                      | Bioanalyser           | 15.7                  | 8.9  | N.A.                   |
| 2202 (72h)  | myofibre     | Qiagen RNeasy kit                      | Bioanalyser           | 17.3                  | 7.7  | N.A.                   |
| 1303 (72h)  | myofibre     | Qiagen RNeasy kit                      | Bioanalyser           | 8                     | 7.5  | N.A.                   |
| 2203 (48h)  | myofibre     | Qiagen RNeasy kit                      | Bioanalyser           | 3.83                  | 8.6  | N.A.                   |
| 2803 (48h)  | myofibre     | Qiagen RNeasy kit                      | Bioanalyser           | 7.7                   | 8    | N.A.                   |
| 2103 (48h)  | myofibre     | Qiagen RNeasy kit                      | Bioanalyser           | 8.4                   | 8.8  | N.A.                   |
| 0204 (48h)  | myofibre     | Qiagen RNeasy kit                      | Bioanalyser           | 11.6                  | 7.4  | N.A.                   |
| 2002 (48h)  | myofibre     | Qiagen RNeasy kit                      | Bioanalyser           | 4.02                  | 7.4  | N.A.                   |
| 1604 (48h)  | myofibre     | Qiagen RNeasy kit                      | Bioanalyser           | 3.2                   | 8.7  | N.A.                   |
| S1 (48h)    | dispersed    | Qiagen RNeasy kit                      | Nanodrop              | 12.2                  | N.A. | 2.2                    |
| S2 (72h)    | dispersed    | Qiagen RNeasy kit                      | Nanodrop              | 22.0                  | N.A. | 2.2                    |
| S3 (48h)    | dispersed    | Qiagen RNeasy kit                      | Nanodrop              | 25.0                  | N.A. | 2.1                    |
| S4 (72h)    | dispersed    | Qiagen RNeasy kit                      | Nanodrop              | 32.9                  | N.A. | 2.2                    |
| S5 (48h)    | dispersed    | Qiagen RNeasy kit                      | Nanodrop              | 35.6                  | N.A. | 2.1                    |
| S6 (72h)    | dispersed    | Qiagen RNeasy kit                      | Nanodrop              | 39.2                  | N.A. | 2.1                    |
| S7 (48h)    | dispersed    | Qiagen RNeasy kit                      | Nanodrop              | 47.2                  | N.A. | 2.2                    |
| S8 (72h)    | dispersed    | Qiagen RNeasy kit                      | Nanodrop              | 66.6                  | N.A. | 2.1                    |

**Supplementary Figure S7 – cited in *Experimental Procedures*: Validation of the**

**protocol to isolate myofibre-associated myoblasts.** **A)** Myofibre-associated myoblasts were stripped off myofibres using trypsin as described in the *Experimental Procedures* section then cytopun and immunostained to detect the SC/myoblast markers PAX7 and MYF5: 100% of the cells cytopun were positive for at least one of these two markers. **B-C)** Isolated myofibre-associated myoblasts were tested for viability and functionality by plating them on gelatin-coated dishes in primary

myoblast growth medium. Three days later isolated myofibre-stripped myoblasts had extensively proliferated in culture (B) and after switching them to low serum medium they underwent differentiation into myotubes (C). **D-E**) Bioanalyzer analysis of the RNA extracted from: negative control (water, lane 2); adherent cells (lane 3); supernatant of isolated myofibre-associated myoblasts plated on gelatin-coated dishes immediately after isolation (lane 4). Please note the massive differences in the Y-axis scales in the chromatograms shown in (E). This analysis reveals that no RNA was present in the supernatant indicating that no RNA was carried over from myofibre debris into the RNA preparations that were used for microarray analysis. **F**) Bioanalyzer analysis of the RNA extracted from all the biological replicates of myofibre-associated myoblasts at 48 hours and 72 hours post-myofibre isolation. Only for one of the 4 replicates of myofibre-associated myoblasts at 48 h, two distinct preparations were pooled to produce one biological replicate. In all other cases each biological replicate corresponded to one independent preparation. **G**) Table reporting, for each RNA sample used in the microarray experiment: sample name, type of myoblast prep, system for preparation, method of quantification, concentration, RIN where applicable and 260/280 ratio where applicable. All RNA samples were eluted in the same volume (14  $\mu$ L) therefore the concentrations reported are a direct measure of the total amount of RNA extracted.

## REFERENCES

- Cornelison, D.D., Filla, M.S., Stanley, H.M., Rapraeger, A.C., Olwin, B.B., 2001. Syndecan-3 and syndecan-4 specifically mark skeletal muscle satellite cells and are implicated in satellite cell maintenance and muscle regeneration. *Dev Biol* 239, 79–94. doi:10.1006/dbio.2001.0416
- Yaffe, D., Saxel, O., 1977. Serial passaging and differentiation of myogenic cells isolated from dystrophic mouse muscle. *Nature* 270, 725–727.
- Yoshida, N., Yoshida, S., Koishi, K., Masuda, K., Nabeshima, Y., 1998. Cell heterogeneity upon myogenic differentiation: down-regulation of MyoD and

Myf-5 generates “reserve cells.” J Cell Sci 111 ( Pt 6), 769–779.

**Supplementary Table 1 – Cited in Results, section 4:** Top three GO terms that are most significantly enriched in genes with CR > 2.

| <b>Term</b>                      | <b>p-value</b> | <b>Genes</b>                                                    | <b>Fold enrichment</b> |
|----------------------------------|----------------|-----------------------------------------------------------------|------------------------|
| Negative regulation of transport | 0.00002        | <i>Lif, Il6, Nos1, Snph, Edn1, Pkia, Adora1, Htr2a</i>          | 8.99                   |
| Striated muscle development      | 0.00004        | <i>Musk, Actc1, Myl2, Tnc, Myog, Ttn, Neurl2</i>                | 10.48                  |
| Taxis                            | 0.00005        | <i>Ccr8, Ccl2, Cxcl3, Cxcl2, Ecscr, Amot, Ccl5, Ccl7, Slit2</i> | 6.68                   |

**Supplementary Table 2 – Cited in Results, section 4:** Top three GO terms that are most significantly enriched in genes with CR < 0.5.

| <b>Term</b>                                    | <b>p-value</b> | <b>Genes</b>                                                                                                                                               | <b>Fold enrichment</b> |
|------------------------------------------------|----------------|------------------------------------------------------------------------------------------------------------------------------------------------------------|------------------------|
| Cell adhesion                                  | 0.0004         | <i>Coll8a1, Selp, Pcdhb7, Pcdhb6, Pcdhb3, Pcdhb4, Itgb4, Cdhr5, Vtn, Pcdh17, Megf10, Dchs1, Cldn15, Aplp1, Wnt7b, Lamb3, Itga6, Lama5, Tro, Otog, Msln</i> | 2.42                   |
| Cell morphogenesis involved in differentiation | 0.0016         | <i>Coll8a1, Ablim1, Sema6a, Notch1, Slc1a3, Rtn4rl1, Cxcr4, Sema3a, Gas1, Ngfr, Cxcl12</i>                                                                 | 3.35                   |
| Cell fate commitment                           | 0.0019         | <i>Notch3, Fgfr4, Notch1, Tbx2, Pax7, Pparg, Cyp26b1, Gas1, Sox8</i>                                                                                       | 3.96                   |

**Supplementary Table 3 – Cited in Experimental Procedures and in Results, section 4:** Comparative analysis of genes that change between 48 and 72 hours according to the formula:  $[(72h/48h)_{dispersed}]/[(72h/48h)_{myofibre-associated}]$  filtered through a manually curated list of genes involved in myogenesis.

| Gene Name       | Fold Change | q-value   |
|-----------------|-------------|-----------|
| <i>Diras2</i>   | 0.054013395 | 0.0000000 |
| <i>Mc4r</i>     | 0.093310186 | 0.0000000 |
| <i>Aqp5</i>     | 0.096597149 | 0.0000000 |
| <i>Ngfr</i>     | 0.105205253 | 0.0000000 |
| <i>Cd5l</i>     | 0.179134772 | 0.0000000 |
| <i>Sema6b</i>   | 0.228863483 | 0.0000000 |
| <i>Trpc3</i>    | 0.233711819 | 0.0235839 |
| <i>Fzd6</i>     | 0.235680061 | 0.0000000 |
| <i>Fgfr4</i>    | 0.236169718 | 0.0000000 |
| <i>Epha1</i>    | 0.250161594 | 0.0000000 |
| <i>Itgb4</i>    | 0.25121833  | 0.0000000 |
| <i>Pitx3</i>    | 0.255210552 | 0.0000000 |
| <i>Itga6</i>    | 0.263171022 | 0.0000000 |
| <i>Notch1</i>   | 0.277726352 | 0.0000000 |
| <i>Col18a1</i>  | 0.278990429 | 0.0000000 |
| <i>Tmem119</i>  | 0.290233444 | 0.0000000 |
| <i>Notch3</i>   | 0.291949448 | 0.0000000 |
| <i>Col10a1</i>  | 0.300396372 | 0.0000000 |
| <i>Cxcr4</i>    | 0.315090189 | 0.0000000 |
| <i>Cdkn2a</i>   | 0.316454481 | 0.0000000 |
| <i>Ly6a</i>     | 0.316960439 | 0.0000000 |
| <i>Sox8</i>     | 0.323270186 | 0.0000000 |
| <i>Tmem44</i>   | 0.328784523 | 0.0000000 |
| <i>Megf10</i>   | 0.335582833 | 0.0000000 |
| <i>Cdc42ep1</i> | 0.337906165 | 0.0000000 |
| <i>Hes6</i>     | 0.338134183 | 0.0000000 |
| <i>Pax7</i>     | 0.344352698 | 0.0000000 |
| <i>Hey1</i>     | 0.345761151 | 0.0000000 |
| <i>Cxcl12</i>   | 0.348607325 | 0.0000000 |
| <i>Sema6a</i>   | 0.349215321 | 0.0000000 |
| <i>Rnf152</i>   | 0.350092944 | 0.0000000 |
| <i>Tmem191c</i> | 0.350341532 | 0.0235839 |
| <i>Pparg</i>    | 0.361863203 | 0.0000000 |
| <i>Rnf144a</i>  | 0.400662004 | 0.0000000 |
| <i>Cdkn2b</i>   | 0.401434376 | 0.0000000 |
| <i>Lama5</i>    | 0.412932128 | 0.0000000 |
| <i>Sema3a</i>   | 0.41859219  | 0.0000000 |
| <i>Tcf7</i>     | 0.423415284 | 0.0000000 |
| <i>Pdgfc</i>    | 0.427927325 | 0.0235839 |
| <i>Tmem176a</i> | 0.428260942 | 0.0235839 |
| <i>Jam2</i>     | 0.43211217  | 0.0000000 |
| <i>Pdgfrl</i>   | 0.436975917 | 0.0000000 |
| <i>Sdc3</i>     | 0.437947492 | 0.0000000 |

|                  |             |           |
|------------------|-------------|-----------|
| <i>Timp4</i>     | 0.442403723 | 0.0000000 |
| <i>Cnnm2</i>     | 0.442786114 | 0.0000000 |
| <i>Mmp15</i>     | 0.449408686 | 0.0000000 |
| <i>Rnf125</i>    | 0.454254155 | 0.0000000 |
| <i>Lamb3</i>     | 0.455321565 | 0.0000000 |
| <i>Rnf208</i>    | 0.463874638 | 0.0000000 |
| <i>Tnfaip8l1</i> | 0.465211468 | 0.0000000 |
| <i>Tmem30b</i>   | 0.471209484 | 0.0235839 |
| <i>Cd200</i>     | 0.472625308 | 0.0000000 |
| <i>Fzd2</i>      | 0.481798531 | 0.0000000 |
| <i>Ace</i>       | 0.485118212 | 0.0000000 |
| <i>Lrp12</i>     | 0.487980149 | 0.0000000 |
| <i>Wnt7b</i>     | 0.491717209 | 0.0000000 |
| <i>Gper</i>      | 0.493160426 | 0.0000000 |
| <i>Creb3l1</i>   | 0.50032382  | 0.0000000 |
| <i>Tcf4</i>      | 0.502701894 | 0.0000000 |
| <i>Tnfrsf25</i>  | 0.511265133 | 0.0235839 |
| <i>Trim62</i>    | 0.511388518 | 0.0000000 |
| <i>Megf9</i>     | 0.512288348 | 0.0235839 |
| <i>Tmem176b</i>  | 0.512579672 | 0.0335022 |
| <i>Chrna1</i>    | 0.512895398 | 0.0000000 |
| <i>Ephb4</i>     | 0.513271937 | 0.0000000 |
| <i>Cdh15</i>     | 0.513597528 | 0.0000000 |
| <i>Igfbp4</i>    | 0.518688547 | 0.0000000 |
| <i>Megf6</i>     | 0.520352228 | 0.0335022 |
| <i>Tmem195</i>   | 0.524521151 | 0.0000000 |
| <i>Cd276</i>     | 0.526542761 | 0.0000000 |
| <i>Traf5</i>     | 0.534764828 | 0.0235839 |
| <i>Map3k11</i>   | 0.541734759 | 0.0000000 |
| <i>Cd2ap</i>     | 0.550591348 | 0.0000000 |
| <i>Tmem121</i>   | 0.56017007  | 0.0235839 |
| <i>Smad6</i>     | 0.56064096  | 0.0000000 |
| <i>Tmem9</i>     | 0.562422561 | 0.0000000 |
| <i>Il20rb</i>    | 0.563193529 | 0.0000000 |
| <i>Tmem229b</i>  | 0.571979361 | 0.0000000 |
| <i>Wnt6</i>      | 0.579395389 | 0.0000000 |
| <i>Ctnnb1</i>    | 0.58218307  | 0.0235839 |
| <i>Pth1r</i>     | 0.583389597 | 0.0000000 |
| <i>Hspa12b</i>   | 0.58409558  | 0.0000000 |
| <i>Il16</i>      | 0.587001345 | 0.0235839 |
| <i>Cdc42ep4</i>  | 0.591780882 | 0.0000000 |
| <i>Cd97</i>      | 0.595509301 | 0.0000000 |
| <i>Jak3</i>      | 0.600945954 | 0.0000000 |
| <i>Cd38</i>      | 0.603198555 | 0.0235839 |
| <i>Tmem86a</i>   | 0.606710437 | 0.0000000 |

|                 |             |           |
|-----------------|-------------|-----------|
| <i>Il18rap</i>  | 0.608983054 | 0.0335022 |
| <i>Mmp11</i>    | 0.61109568  | 0.0000000 |
| <i>F2r</i>      | 0.618226226 | 0.0000000 |
| <i>Cdk19</i>    | 0.618693237 | 0.0000000 |
| <i>Il34</i>     | 0.619225504 | 0.0000000 |
| <i>Mmp17</i>    | 0.62185378  | 0.0235839 |
| <i>Map4k2</i>   | 0.623623769 | 0.0000000 |
| <i>Cxcr7</i>    | 0.624860007 | 0.0000000 |
| <i>Hmgb3</i>    | 0.624875968 | 0.0000000 |
| <i>Tmem173</i>  | 0.630723339 | 0.0000000 |
| <i>Six2</i>     | 0.631694902 | 0.0335022 |
| <i>Ctnnbip1</i> | 0.63742738  | 0.0335022 |
| <i>Fzd3</i>     | 0.639107577 | 0.0335022 |
| <i>Socs2</i>    | 0.64750778  | 0.0335022 |
| <i>Hmgn5</i>    | 0.648216068 | 0.0235839 |
| <i>Stat2</i>    | 0.658367534 | 0.0235839 |
| <i>Cdk2ap2</i>  | 0.659850247 | 0.0000000 |
| <i>Met</i>      | 0.665855282 | 0.0000000 |
| <i>Sdc4</i>     | 0.667108623 | 0.0235839 |
| <i>Tcf3</i>     | 0.668449518 | 0.0000000 |
| <i>Trim12</i>   | 0.671382361 | 0.0335022 |
| <i>Ilkap</i>    | 0.675550964 | 0.0335022 |
| <i>Ccna2</i>    | 0.675932308 | 0.0235839 |
| <i>Mapk3</i>    | 0.686093157 | 0.0000000 |
| <i>Itga3</i>    | 0.688256775 | 0.0000000 |
| <i>Ilf2</i>     | 0.689515315 | 0.0000000 |
| <i>Grb10</i>    | 0.691704377 | 0.0000000 |
| <i>Tmem110</i>  | 0.694182038 | 0.0335022 |
| <i>Itm2c</i>    | 0.701841327 | 0.0335022 |
| <i>Cd3eap</i>   | 0.704417076 | 0.0335022 |
| <i>Rnf38</i>    | 0.704939689 | 0.0335022 |
| <i>Nfkbil2</i>  | 0.705436177 | 0.0335022 |
| <i>Map3k12</i>  | 0.711453353 | 0.0235839 |
| <i>Mybl2</i>    | 0.712538267 | 0.0235839 |
| <i>Cdh8</i>     | 0.733437491 | 0.0235839 |
| <i>Cdkn2c</i>   | 0.733704766 | 0.0235839 |
| <i>Cd151</i>    | 0.734003656 | 0.0235839 |
| <i>Casp2</i>    | 0.740118071 | 0.0335022 |
| <i>Cdk10</i>    | 0.742337344 | 0.0235839 |
| <i>Atoh8</i>    | 0.743759899 | 0.0235839 |
| <i>Cdk2ap1</i>  | 0.759884675 | 0.0335022 |
| <i>Tmem179b</i> | 0.790983217 | 0.0335022 |
| <i>Tmem50a</i>  | 0.791326965 | 0.0335022 |
| <i>Col9a2</i>   | 0.805013649 | 0.0235839 |
| <i>Nos2</i>     | 0.808038002 | 0.0235839 |

|                 |             |           |
|-----------------|-------------|-----------|
| <i>Rnf160</i>   | 1.182986633 | 0.0335022 |
| <i>Ppara</i>    | 1.226111384 | 0.0235839 |
| <i>Rnf103</i>   | 1.265119029 | 0.0000000 |
| <i>Abl2</i>     | 1.28007608  | 0.0235839 |
| <i>Rnf181</i>   | 1.28600617  | 0.0335022 |
| <i>Sod2</i>     | 1.288438354 | 0.0235839 |
| <i>Tmem126a</i> | 1.297795278 | 0.0335022 |
| <i>Large</i>    | 1.304309246 | 0.0335022 |
| <i>Tmem9b</i>   | 1.31584281  | 0.0335022 |
| <i>Rnf170</i>   | 1.32832226  | 0.0235839 |
| <i>Lamc1</i>    | 1.338170117 | 0.0335022 |
| <i>Crybg3</i>   | 1.352691383 | 0.0235839 |
| <i>Rnf19b</i>   | 1.377284374 | 0.0335022 |
| <i>Nfix</i>     | 1.428716223 | 0.0335022 |
| <i>Cd300lg</i>  | 1.487985697 | 0.0335022 |
| <i>Itga2b</i>   | 1.518339592 | 0.0335022 |
| <i>Cdc42ep3</i> | 1.520005509 | 0.0335022 |
| <i>Trim23</i>   | 1.53151972  | 0.0335022 |
| <i>Cdkn1c</i>   | 1.568324588 | 0.0235839 |
| <i>Ccng1</i>    | 1.608196047 | 0.0335022 |
| <i>Tmem143</i>  | 1.681525317 | 0.0000000 |
| <i>Ar</i>       | 1.706092125 | 0.0235839 |
| <i>Mef2d</i>    | 1.71779398  | 0.0000000 |
| <i>Tmem51</i>   | 1.720317928 | 0.0335022 |
| <i>Myc</i>      | 1.727137888 | 0.0235839 |
| <i>Tmem14a</i>  | 1.741341997 | 0.0000000 |
| <i>Rnf113a2</i> | 1.748848333 | 0.0000000 |
| <i>Traf3</i>    | 1.749643353 | 0.0000000 |
| <i>Rnf128</i>   | 1.758049346 | 0.0000000 |
| <i>Col4a5</i>   | 1.764058974 | 0.0235839 |
| <i>Hes2</i>     | 1.807606777 | 0.0335022 |
| <i>Rnf123</i>   | 1.822805482 | 0.0335022 |
| <i>Itga5</i>    | 1.824026319 | 0.0335022 |
| <i>Tmem65</i>   | 1.844739221 | 0.0000000 |
| <i>Mapk14</i>   | 1.877026513 | 0.0000000 |
| <i>Tmem25</i>   | 1.877475243 | 0.0000000 |
| <i>Tmem170</i>  | 1.890353302 | 0.0335022 |
| <i>Myh7</i>     | 1.904240751 | 0.0335022 |
| <i>Hdac9</i>    | 2.039262001 | 0.0335022 |
| <i>Cd93</i>     | 2.077909983 | 0.0335022 |
| <i>Ang2</i>     | 2.119929417 | 0.0000000 |
| <i>Fgf10</i>    | 2.136513435 | 0.0335022 |
| <i>Rnf39</i>    | 2.142887692 | 0.0235839 |
| <i>Rnf115</i>   | 2.185271495 | 0.0335022 |
| <i>Tmem74</i>   | 2.189673882 | 0.0235839 |

|                 |             |           |
|-----------------|-------------|-----------|
| <i>Wnt5a</i>    | 2.225643565 | 0.0000000 |
| <i>Tgfb3</i>    | 2.243237532 | 0.0335022 |
| <i>Nos1</i>     | 2.244337119 | 0.0000000 |
| <i>Tnfaip3</i>  | 2.370856078 | 0.0335022 |
| <i>Tmem22</i>   | 2.382163203 | 0.0335022 |
| <i>Timp3</i>    | 2.389738255 | 0.0000000 |
| <i>Grb14</i>    | 2.450073063 | 0.0335022 |
| <i>Icam1</i>    | 2.480875001 | 0.0000000 |
| <i>Cd34</i>     | 2.502741332 | 0.0235839 |
| <i>Fgf13</i>    | 2.522457048 | 0.0335022 |
| <i>Tnfrsf26</i> | 2.526705886 | 0.0335022 |
| <i>Cxcl1</i>    | 2.571387986 | 0.0335022 |
| <i>Rnf150</i>   | 2.613735241 | 0.0000000 |
| <i>Cxcr6</i>    | 2.666414714 | 0.0235839 |
| <i>Hspb1</i>    | 2.671942324 | 0.0335022 |
| <i>Igf2bp1</i>  | 2.685073278 | 0.0335022 |
| <i>Lama4</i>    | 2.694176556 | 0.0000000 |
| <i>Col11a1</i>  | 2.81007029  | 0.0000000 |
| <i>Il1rl1</i>   | 2.883004106 | 0.0235839 |
| <i>Angpt2</i>   | 2.889406621 | 0.0000000 |
| <i>Ctgf</i>     | 2.917124574 | 0.0000000 |
| <i>Trim55</i>   | 2.943127311 | 0.0235839 |
| <i>Sema3c</i>   | 2.962051241 | 0.0000000 |
| <i>Itga11</i>   | 3.097928862 | 0.0335022 |
| <i>Smad3</i>    | 3.143103306 | 0.0335022 |
| <i>Itgb7</i>    | 3.180213711 | 0.0000000 |
| <i>Des</i>      | 3.276458094 | 0.0335022 |
| <i>Wnt9a</i>    | 3.473096788 | 0.0000000 |
| <i>Tmem132e</i> | 3.637282601 | 0.0000000 |
| <i>Tnfaip6</i>  | 3.705210584 | 0.0000000 |
| <i>Crym</i>     | 3.715182105 | 0.0335022 |
| <i>Pdgfra</i>   | 3.799874363 | 0.0000000 |
| <i>Tmem56</i>   | 3.824028259 | 0.0000000 |
| <i>Stac3</i>    | 4.096755699 | 0.0000000 |
| <i>Itga2</i>    | 4.151801886 | 0.0000000 |
| <i>Myl2</i>     | 4.478819312 | 0.0000000 |
| <i>F3</i>       | 4.53209333  | 0.0000000 |
| <i>Itgb1bp2</i> | 5.052382919 | 0.0000000 |
| <i>Cxcl2</i>    | 5.21740209  | 0.0000000 |
| <i>Il6</i>      | 5.883417321 | 0.0000000 |
| <i>Cxcl5</i>    | 7.072889179 | 0.0335022 |
| <i>Mmp10</i>    | 8.091003904 | 0.0000000 |
| <i>Mmp3</i>     | 9.798800323 | 0.0000000 |
| <i>Csf2</i>     | 10.41366572 | 0.0000000 |
| <i>Postn</i>    | 13.13746879 | 0.0000000 |



|              |             |           |
|--------------|-------------|-----------|
| <i>Fgf21</i> | 13.98192167 | 0.0000000 |
| <i>Cxcl3</i> | 15.22060208 | 0.0000000 |
| <i>Myl3</i>  | 18.83977572 | 0.0000000 |
| <i>Myog</i>  | 20.03261426 | 0.0000000 |
| <i>Mmp13</i> | 28.20644517 | 0.0000000 |
